# Supplementary material for: Optimizing Surgical Care Amidst COVID-19: A Scoping Review of Practices and Policies
Source: MDPI journal article supplement (doi:10.3390/healthcare12010096), 2023-12-31
Supplement: s1 [file s1]

**Table S1.** Characteristics of included studies.

| S.No | Author(s)               | Sample                                                                                          | Findings                                                                                                      |
|------|-------------------------|-------------------------------------------------------------------------------------------------|---------------------------------------------------------------------------------------------------------------|
| 1    | Francis, N., et al.     | N/A                                                                                             | Guidelines for safe minimally invasive surgery during COVID-19, emphasizing protective measures.              |
| 2    | Frakes, M.A., et al.    | N/A                                                                                             | Study on adapting critical care transport during the pandemic with a focus on new protocols and adaptability. |
| 3    | Prachand, V.N., et al.  | N/A                                                                                             | Introduction of a scoring system for prioritizing time-sensitive surgeries during COVID-19.                   |
| 4    | ACS                     | N/A                                                                                             | Recommendations for triaging non-emergency surgeries during the pandemic.                                     |
| 5    | Ksenak, C.              | N/A                                                                                             | Statement on safely resuming hospital and office-based procedures amid COVID-19.                              |
| 6    | Saleeby, E., et al.     | 392 female gynecology patients                                                                  | Evaluation of a modified surgical prioritization tool in gynecology during the pandemic.                      |
| 7    | Teklewold, B., et al.   | N/A                                                                                             | Reduced preoperative waiting times for elective surgeries in Ethiopia during the pandemic.                    |
| 8    | Wee, L.E., et al.       | N/A                                                                                             | Emphasizing early COVID-19 detection in surgical patients.                                                    |
| 9    | Wake, R.M., et al.      | N/A                                                                                             | Triage system to reduce in-hospital COVID-19 transmission.                                                    |
| 10   | Hsu, C.H., et al.       | N/A                                                                                             | Triage protocol for post-surgery patients to prevent COVID-19 spread.                                         |
| 11   | Stone, R. and S. Scheib | Not provided                                                                                    | Benefits of enhanced recovery protocols in perioperative care during the pandemic.                            |
| 12   | Ljungqvist, O., et al.  | Not provided                                                                                    | Discussing improved-expanded form of MeNTS and challenges in enhanced recovery after surgery.                 |
| 13   | Matava, C., et al.      | 247 patients                                                                                    | Impact of a weekend surgery program in reducing pediatric surgery backlog in Canada.                          |
| 14   | Wu, J., et al.          | Not provided                                                                                    | Mobilization of resources for full surgical service capacity in Wuhan.                                        |
| 15   | Bose, S.K., et al.      | Cases abstracted from the Nationwide Inpatient Sample (2016-2017)<br>Adult patients             | Estimating the financial impact of canceled elective surgeries nationally.                                    |
| 16   | Dobbs, T.D., et al.     | undergoing surgery between Jan 1 and Dec 31, 2020 in England and Wales                          | 33.6% reduction in surgical activity in 2020, with over 1.5 million cancelled operations.                     |
| 17   | Gomez, D., et al.       | Surgical procedures in Ontario, Canada during COVID-19<br>Kaiser Permanente Northern California | Decreased rate of surgical procedures during COVID-19 due to reduction in elective procedures.                |
| 18   | Kuehner, G., et al.     | members referred to surgical services from Jan 1, 2019 to Jun 13, 2020                          | Significant shift to telemedicine for preoperative and postoperative encounters during COVID-19.              |

|    |                         |                                                                                                                 |                                                                                                                        |
|----|-------------------------|-----------------------------------------------------------------------------------------------------------------|------------------------------------------------------------------------------------------------------------------------|
| 19 | Schulberg, S.P., et al. | COVID-19 patients in a New York City hospital                                                                   | Surgical residents team improved efficiency of care for critical COVID-19 patients.                                    |
| 20 | Baoas, S.D., et al.     | Confirmed COVID-19 cases in Brooklyn, New York from March-May 2020                                              | Presence of surgery had a significant impact on COVID-19 patients discharge destinations.                              |
| 21 | Mattingly, A.S., et al. | Pediatric and adult patients undergoing surgical procedures in 49 US states                                     | Initial shutdown associated with decrease in surgical procedure volume to nearly half of baseline rates.               |
| 22 | Low, T.Y., et al.       | Not specified                                                                                                   | Restructuring the surgical service during COVID-19 in Singapore is feasible and safe.                                  |
| 23 | Bugaev, N., et al.      | Patients treated by an ACS service between January and May 2020 in an urban tertiary academic medical center    | Trauma and emergency general surgery volumes decreased during the COVID surge.                                         |
| 24 | Chu, K.M., et al.       | Six government hospitals in Western Cape, SA                                                                    | Total general surgery operations decreased by 44% during the COVID-19 lockdown.                                        |
| 25 | McLean, R.C., et al.    | Emergency general surgery admissions in the UK, before and after lockdown                                       | Following lockdown, a significant reduction in median daily admissions.                                                |
| 26 | Welk, B. and L. Richard | Individuals with a positive COVID-19 test and their matched controls in Ontario, Canada                         | Following COVID-19, there is not an increased risk of needing several common surgical procedures.                      |
| 27 | Guadalajara, H., et al. | ASIP cases from 2019, 2020 and 2021 (March 14th to May 2nd) in Spain                                            | The number of patients treated for ASIP reduced by 1/3rd during the first COVID -19 wave.                              |
| 28 | Rovers, M.M., et al.    | A large hospital in the Netherlands                                                                             | Development of a surgical prioritisation framework showing the highest loss in quality of life due to delayed surgery. |
| 29 | Sa, A.F., et al.        | Patients who underwent urgent/emergency surgery between March 1st and May 2nd of both 2020 and 2019 in Portugal | 30% less patients underwent urgent/emergency surgery during the COVID-19 pandemic.                                     |
| 30 | Laas, D.J., et al.      | Tertiary hospital in KwaZulu-Natal Province, South Africa                                                       | Theatre caseload decreased by 30% from January to April 2020.                                                          |
| 31 | Pardolesi, A., et al.   | 83 patients with lung cancer                                                                                    | Telemedicine program for lung cancer patients was effective and preferred.                                             |

|    |                         |                                                                                                                              |                                                                                                                        |
|----|-------------------------|------------------------------------------------------------------------------------------------------------------------------|------------------------------------------------------------------------------------------------------------------------|
| 32 | Hinchcliffe, Z., et al. | 327 patients undergoing day case laparoscopic cholecystectomy (expanded form of DCLC)                                        | Identifying patient factors linked to successful expanded form of DCLC in isolated day-case units during the pandemic. |
| 33 | Passoni, R., et al.     | Brazilian National Transplant System data analysis                                                                           | Kidney transplant activities in Brazil decreased by 23.9% during the pandemic.                                         |
| 34 | Sukmanee, J., et al.    | Universal Coverage Scheme data for acute appendicitis patients from 2016 to 2021                                             | Reduction in acute appendicitis cases during lockdown in Thailand suggests potential overdiagnosis.                    |
| 35 | Teoh, J.Y., et al.      | 1004 urological service providers                                                                                            | Global impact of COVID-19 on urological care and providers.                                                            |
| 36 | Lambracos, S., et al.   | Urology service data during NHRFA level 2                                                                                    | Significant decrease in outpatient consultations and procedural clinic appointed-expanded form of MeNTS in urology.    |
| 37 | Hussain, A., et al.     | 2600 cardiac surgery patients                                                                                                | Unexpected reduction in sternal wound infections during the COVID-19 pandemic.                                         |
| 38 | Vlastos, D., et al.     | Patients operated on from March 2020 to May 2020                                                                             | Impact of the pandemic on aortic valve surgical service, with a 70% reduction in elective cases.                       |
| 39 | McPherson, I., et al.   | Patients receiving open and endovascular thoracic aortovascular intervention                                                 | Increase in urgent cases of thoracic aortovascular disease in 2020, with no significant outcome differences.           |
| 40 | Leung, S., et al.       | N/A                                                                                                                          | Study on the evolving impact of COVID-19 on surgical services, with no specific findings provided.                     |
| 41 | Al-Thani, H., et al.    | All vascular outpatient encounters during 2019 and 2020                                                                      | 61% of total patient encounters in 2020 were via teleconsultation in vascular surgery.                                 |
| 42 | Chen, A.J., et al.      | 94 patients and 144 telemedicine visits over a 22-month period                                                               | Telemedicine provided safe, efficient care during the pandemic and saved travel for patients.                          |
| 43 | Traina, L., et al.      | PAD patients requiring revascularization between March 2019 and March 2021                                                   | More severe stages of limb ischemia during the pandemic periods.                                                       |
| 44 | Veraldi, G.F., et al.   | Vascular procedures performed between March 2019 and December 2019 (prepandemic) compared to March–December 2020 (pandemic). | Increase in limb-threatening ischemia and major limb amputation during the pandemic.                                   |

|    |                            |                                                                                                                                                          |                                                                                                              |
|----|----------------------------|----------------------------------------------------------------------------------------------------------------------------------------------------------|--------------------------------------------------------------------------------------------------------------|
|    |                            | Referrals to oncologic surgical specialty clinics at an academic tertiary care institution following implementation of stay-at-home orders in California |                                                                                                              |
| 45 | Sutjiadi, B., et al.       | Consecutive patients undergoing immediate breast reconstruction                                                                                          | Decrease in patients seen in oncologic surgical specialty clinics during COVID-19, with higher acuity cases. |
| 46 | Specht, M., et al.         | Orthopaedic surgical cases in South Africa                                                                                                               | Successful same-day breast reconstruction during the COVID-19 crisis with no complications.                  |
| 47 | Waters, R., et al.         | All Medicare fee-for-service beneficiaries undergoing shoulder arthroplasty                                                                              | Drastic reduction in orthopaedic services during COVID-19 in South Africa.                                   |
| 48 | Avant-Garde, H., et al.    | Data on theatre timings and procedures                                                                                                                   | Decrease in shoulder arthroplasty volume during the pandemic, but shorter hospital stays.                    |
| 49 | Sharkey, S., et al.        | Patients undergoing orthopaedic trauma surgery in the UK                                                                                                 | Significant reduction in theatre efficiency due to COVID-19 restrictions in the UK.                          |
| 50 | Karanjia, R., et al.       | Orthopaedic trauma care at a university teaching hospital                                                                                                | Increased delays and overall case time in orthopaedic trauma surgery during COVID-19.                        |
| 51 | Kulkarni, K., et al.       | Theatre productivity analysis in London                                                                                                                  | Paradigm shift in trauma care due to COVID-19, leading to more cost-effective practices.                     |
| 52 | Jeyaseelan, L., et al.     | Survey of senior clinicians or service managers                                                                                                          | Modest delays in theatre use and decreased efficiency due to COVID-19 in major trauma centres in the UK.     |
| 53 | Hall, A.J., et al.         | Retrospective study in hand surgery and microsurgery                                                                                                     | Disruption to hip-fracture services during COVID-19, affecting surgical facilities and theatre efficiency.   |
| 54 | Leti Acciaro, A., et al.   | Compilation of best evidence on rhinologic and skull-based surgeries                                                                                     | Significant reduction in surgical procedures in hand surgery and microsurgery during COVID-19.               |
| 55 | Chan, Y., et al.           | Guidelines for facial trauma procedures                                                                                                                  | Guidelines for safely restarting rhinologic and skull-based surgeries during COVID-19.                       |
| 56 | Hsieh, T.Y., et al.        | Experience of emergency tracheostomy in a surgical oncology unit                                                                                         | Stratification and protective measures for facial trauma procedures during COVID-19.                         |
| 57 | George, C.K., et al.       | 143 ventilator-dependent COVID-19 patients undergoing tracheostomy                                                                                       | Challenges of performing emergency tracheostomy during COVID-19 due to aerosolization risk.                  |
| 58 | Krishnamoorthy, S., et al. |                                                                                                                                                          | Safe and efficient tracheostomy in ventilator-dependent COVID-19 patients.                                   |

|    |                              |                                                                        |                                                                                                                    |
|----|------------------------------|------------------------------------------------------------------------|--------------------------------------------------------------------------------------------------------------------|
| 59 | Sethia, R., et al.           | Head and neck surgery patients undergoing at-home drain removal        | Safe and efficacious at-home drain removal in head and neck surgery patients.                                      |
| 60 | Alshareef, M., et al.        | Adult rhinology cases receiving telemedicine care                      | Effective use of telemedicine in managing rhinology cases during the COVID-19 pandemic.                            |
| 61 | Johal, K.S., et al.          | Pediatric fracture patients in an urban pediatric emergency department | Decline in pediatric fractures during COVID-19, with longer times to surgical follow-up.                           |
| 62 | Lapsa, J., et al.            | N/A                                                                    | Impact of COVID-19 on pediatric fracture patterns and follow-up care in an urban emergency department.             |
| 63 | Sullivan, J.E., et al.       | In-hospital pediatric surgery consultations during early COVID-19      | More efficient triaging for pediatric surgical consultations in the emergency department during early COVID-19.    |
| 64 | Mallenahalli, S., et al.     | 377 pediatric urologists globally                                      | Significant disruptions in pediatric urology services due to COVID-19, with increased telemedicine use.            |
| 65 | Cockrell, H.C., et al.       | Pediatric patients seen by surgical or pre-anesthesia providers        | Telehealth use for pediatric surgery reduced patient travel and CO2 emissions, but had lower use among minorities. |
| 66 | Shrestha, B.M.               | Not specified                                                          | Discussion on delivering surgical services during the COVID-19 pandemic.                                           |
| 67 | Collaborative, C.O.          | Not specified                                                          | Study on surgical workforce availability during COVID-19, predicting sufficient staffing for elective surgeries.   |
| 68 | Chu, K.M., et al.            | Surgeons working in South African hospitals                            | Changes in surgical practice in South Africa during COVID-19 lockdown, including reduced operations.               |
| 69 | Patriti, A., et al.          | Surgeons from multiple Italian regions                                 | Emergency general surgery reorganization in Italy during COVID-19, with varied compliance with recommendations.    |
| 70 | Alanezi, F., et al.          | 336 healthcare practitioners in Saudi Arabia                           | Positive attitudes among Saudi healthcare practitioners towards managing COVID-19 outbreak.                        |
| 71 | Wiadji, E., et al.           | 683 Australian Fellows of the Royal Australasian College of Surgeons   | Surgeons in Australia adopted telehealth during the pandemic, noting its limitations and benefits.                 |
| 72 | Edwards, J.A., et al.        | Not specified                                                          | Surgical training restructuring and maintaining surgical services during COVID-19.                                 |
| 73 | Alhodaib, H. and T.M. Alanzi | 1698 Saudi Arabian citizens                                            | Increased adoption of digital health technologies in Saudi Arabia during COVID-19.                                 |
| 74 | Ma, X., et al.               | Not specified                                                          | Impact of COVID-19 on emergency and essential surgical healthcare in low- and middle-income countries.             |
| 75 | Weber LeBrun, E.E., et al.   | Not specified                                                          | Adjusting surgical services for gynecology and obstetrics during the COVID-19 pandemic.                            |
